# Supplementary material for: The Immunomodulatory Effect of β-Glucan Depends on the Composition of the Gut Microbiota
Source: MDPI journal article supplement (doi:10.3390/foods12173148), 2023-08-22
Supplement: s1 [file s1]

## Supplementary Figure

### A. COX-2

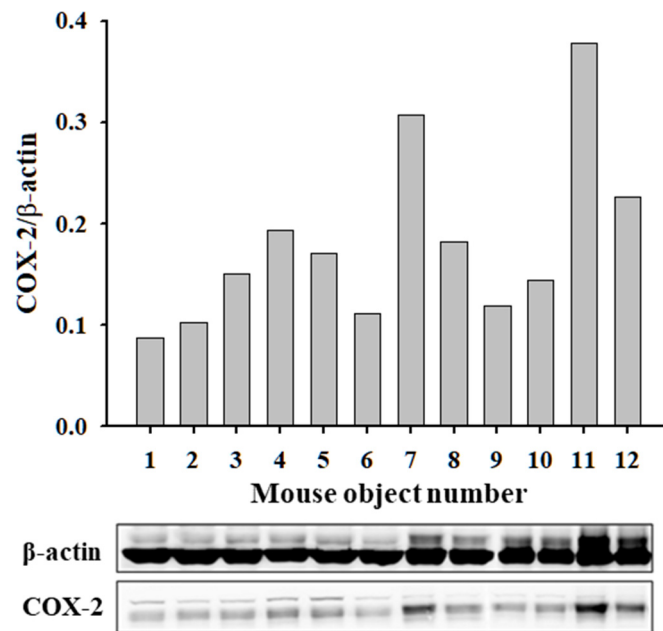

### B. IL-6

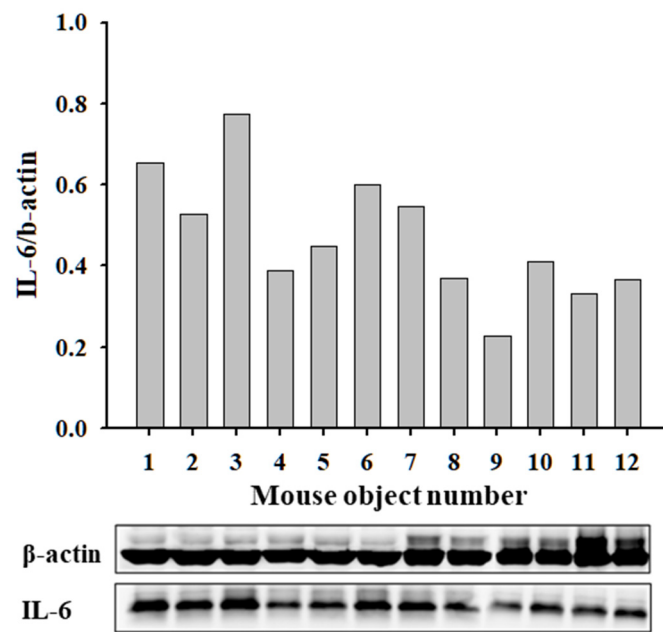

### C. IL-10

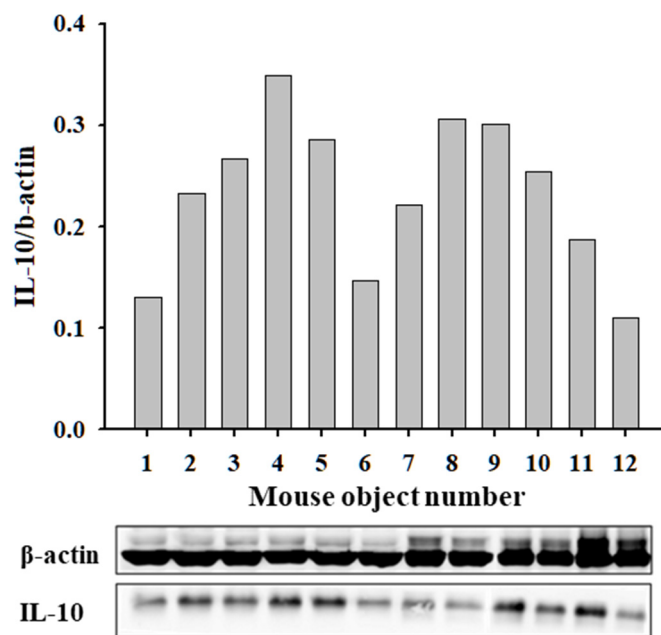

### D. iNOS

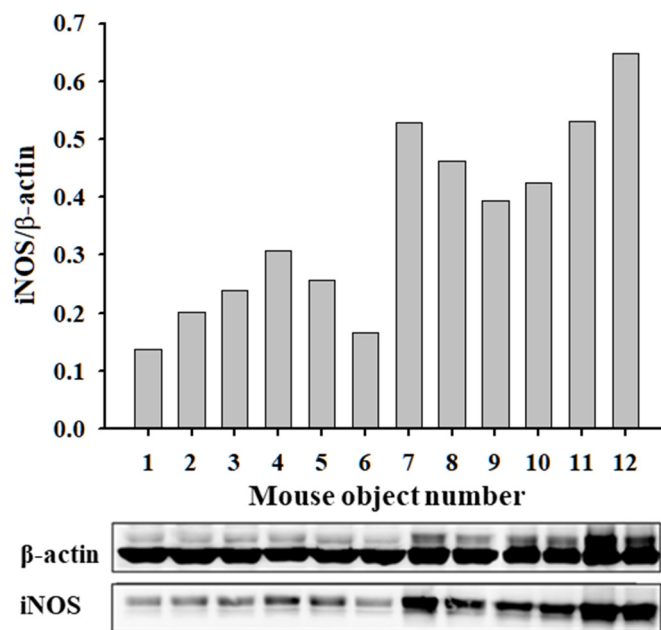

### E. $\text{TNF-}\alpha$

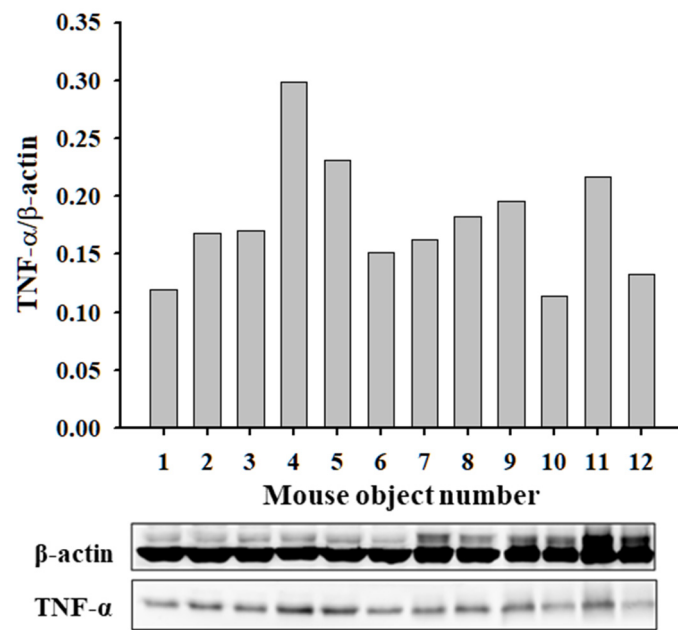

**Supplementary Figure S1.** The gel images and expression level of proteins related with immune response in each mouse.
